# Supplementary material for: Functional characterization of lysosomal interaction of Akt with VRK2
Source: PubMed Central journal article supplement (PMC6172193; doi:10.1038/s41388-018-0330-0), 2018-06-05

**a**

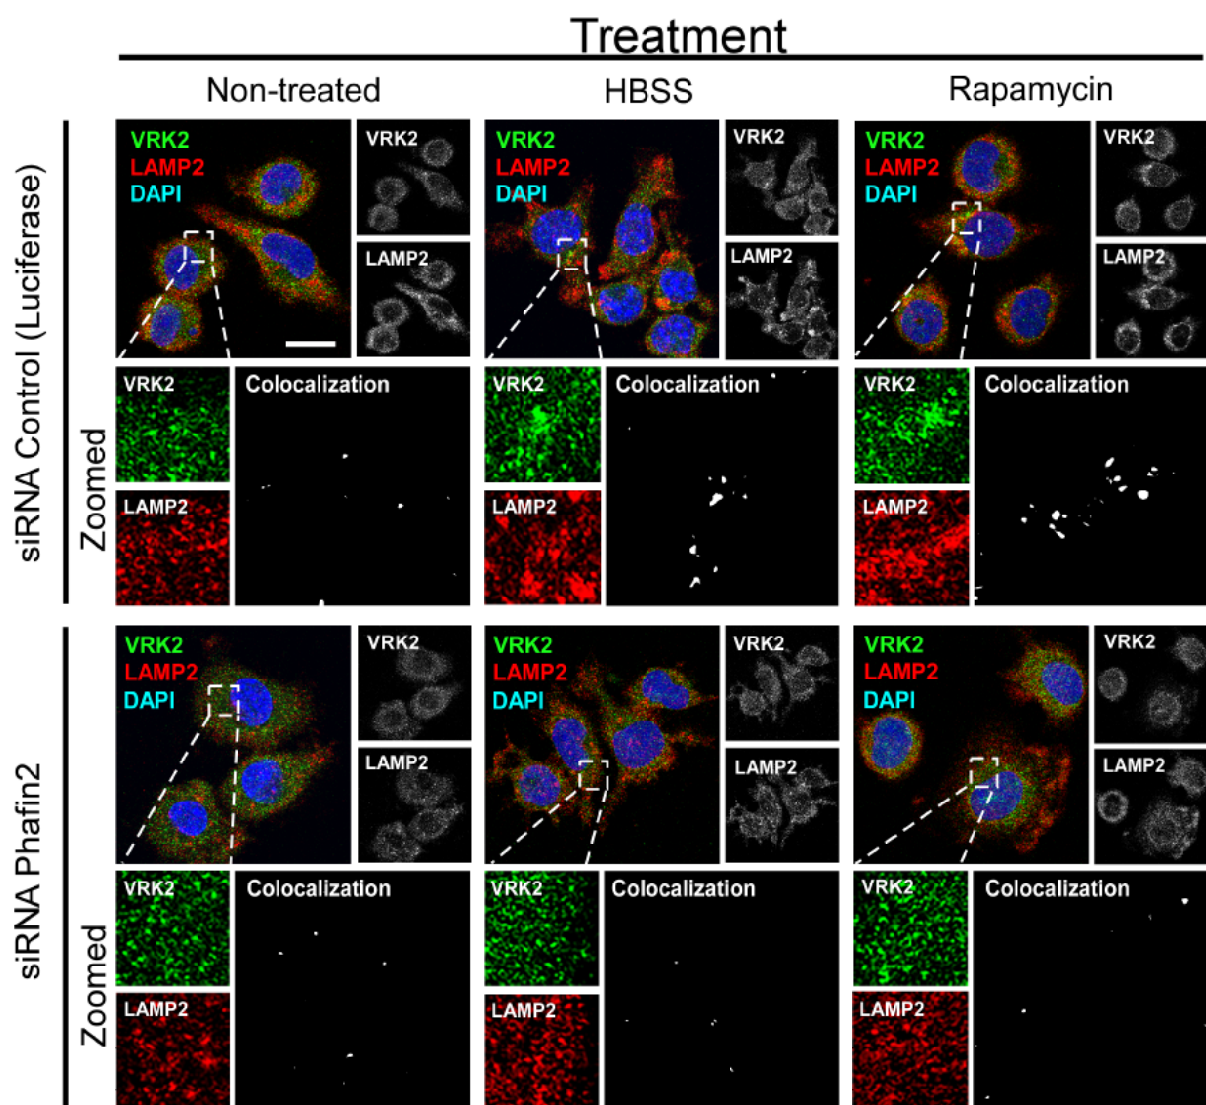

**b**

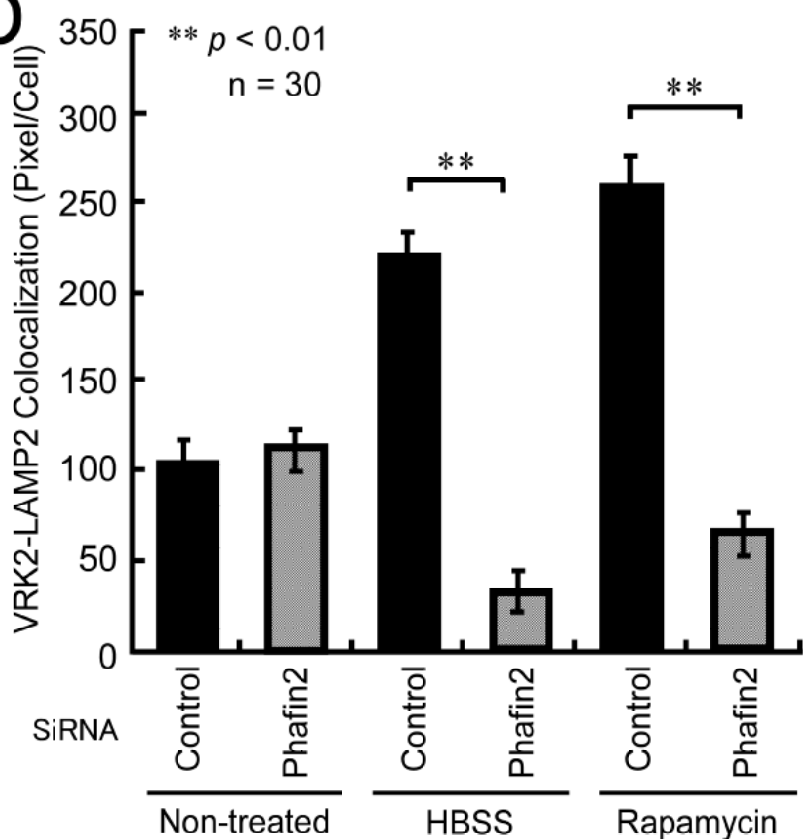

**c**

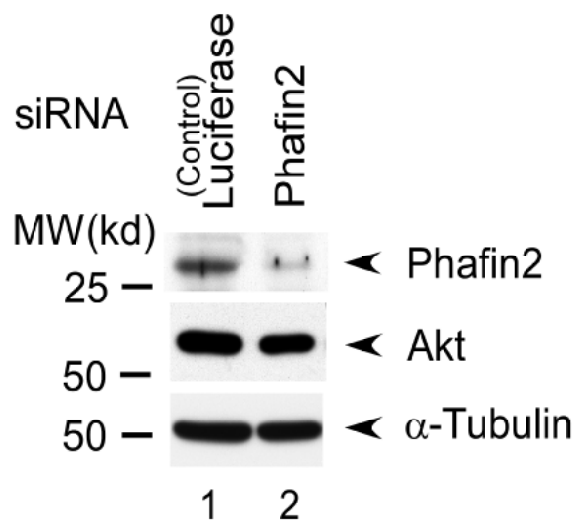

Supplement: 41388_2018_330_MOESM6_ESM.pdf [file 41388_2018_330_MOESM6_ESM.pdf]
