# Supplementary material for: Functional characterization of lysosomal interaction of Akt with VRK2
Source: Oncogene. 2018 Jun 5;37(40):5367–86. doi: 10.1038/s41388-018-0330-0 (PMC6172193; doi:10.1038/s41388-018-0330-0)
Supplement: Supplementary file 3 — Supplemental Fig 2 [file 41388_2018_330_MOESM3_ESM.pdf]

# Supplemental data 2 (Fig. 1 & 2 related)

a

VRK1 -----  
 VRK2 -----  
 VRK3 MISFCPDCGKSIQA AFKFCPYCGNSLPVEEHVGSQTFVNP HVSS FQGSKRGLNSSFETSP

VRK1 -----  
 VRK2 -----  
 VRK3 KKVKWSSTVTSPRLSLFSDGDSSEEDTLSSSERSKSGSRPPTPKSSPQKTRKSPQVTR

VRK1 -----MPRVKAAQAGRQSSAKRHLAEQFAVGEIITDMAKKEWKVGLPIGQGGFGCI  
 VRK2 -----MPPKRNEKYKLP IPFPEGKVLDDMEGNQWVLGKKIGSGGFLI  
 VRK3 GSPQKTSCSPQKTRQSPQTLKRSRVTTSLALPTGTVLTDKSGRQWKLSFQTRDNQGIL  
 : \* : : \* : \* : : \* :

VRK1 YLADMNSSSESVGS--DAPCVV KVEPSDNGPLFTELKFYQRAAKPEQIQKWIRTRKLKYL  
 VRK2 YLAFPTNKPEK----DARHV V KVEYQENGPLFSELKFYQRAAKDCIKKWI ERKQLDYL  
 VRK3 YEAAPTSTLTCDSGPQKQKFS LKLD AKDGRLFNEQNFFQRAAKPLQVNKWKLYSTPLLA  
 \* \* . . . : . : \* \* \* \* : \* \* \* \* : \* \* \* \* : \* \* \* \* : \*

VRK1 VPKYWGSGLHDKNGKSYRFMIMDRFGSDLQKIYEA-NAKRFSRKT V LQSLRLILDILEYI  
 VRK2 IPLFYGSGLTEFKGRSYRFMVMERLGIDLQKISGQ-NGT-FKKSTVLQLGIRMLDVLEYI  
 VRK3 IPTCMGFGVHQDK---YRFLV LPSLGRSLQSLALDVSPKHVLSERSVLQVACRLLDAL EFL  
 : \* \* \* : : \* \* \* : : \* \* \* : : \* \* \* : : \* \* \* : : \* \* \* : \*

VRK1 HEHEYVHGDI KASNLLNLYKNPDQVYLVDYGLAYRYCPEGVHKEYKEDPKRCHDGTIEFT  
 VRK2 HENEYVHG D V K AANLL LGYKNPDQVYLADYGLSYRYCPNGNHKQYQENPRKGHNGTIEFT  
 VRK3 HENEYVHG N V T AENIFVDPEDQSQVTLAGYGFAFRYCPSGKHVAYVEGSRSPHEGDLEFI  
 \* \* \* \* \* : : \* \* : : : : \* \* \* \* : \* \* \* \* : \* \* \* \* : \* \* \* \* :

VRK1 SIDA HNGVAPSRRGDLEILGYCMIQWLTGHLPWEDNLKDPKYVRDSKIRYRENIASLMDK  
 VRK2 SLDAHKGVALSRRSDVEILGYCMLRWLCGKLPWEQNLKDPVAVQTAKTNLLDEL PQSVLK  
 VRK3 SMDLHKGCGPSRRSDLQSLGYCMLKWLYGFLPWTNCLPNTEDIMKQKQKFVDKPGPFVGP  
 \* \* \* \* \* : \* \* \* : \* \* \* : \* \* \* : \* \* \* : \* \* \* : \* \* \* : \*

VRK1 CFPEKNKPGEIAKYMETVKLLDYTEKPLYENLRDILLQGLKAIGSKDDGK-----L  
 VRK2 WAPSGSSCCEIAQFLVCAHSLAYDEKPNYQALKKILNPHGIPLGPLDFSTKGQSINVHTP  
 VRK3 CGHWIRPSETLQYLVVMALTYEEKPPYAMLRNNLEALLQDLR-----  
 : : : : \* \* \* \* \* : \* \* \* : :

VRK1 DLSVVENGG LKAKTITKRRKKEIEESKEPG-----VEDTEWSNTQT EEA IQTRS  
 VRK2 NSQKVDSQKAATKQVNKAHNRLIEKKVHSERSAESCATWKVQKEEKLIGLMNNEAAQEST  
 VRK3 -VSPYDPIGLPMVP-----  
 . :

VRK1 RTRKRVQK-----  
 VRK2 RRRQKYQESQEPLNEVNSFPQKISYTFPNSFYEPHQDFTSPDIFKKSRSPSWYKYTSTV  
 VRK3 -----

VRK1 -----  
 VRK2 STGITDLESSTGLWPTISQFTLSEETNADVYYR I I I P V L L M L V F L A L F F L  
 VRK3 -----

Transmembrane Domain

Kinase Domain

▼ ATP binding site

▼ kinase active site

b

## Structure of VRK2A and VRK2B

VRK2A

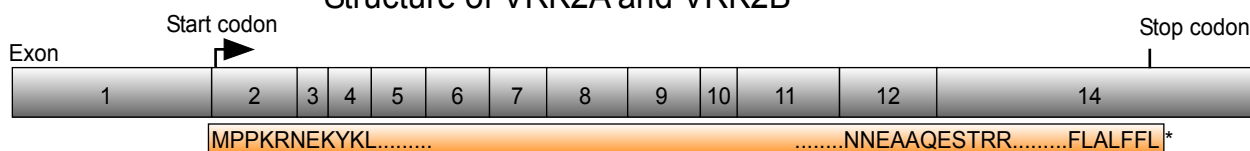

VRK2B

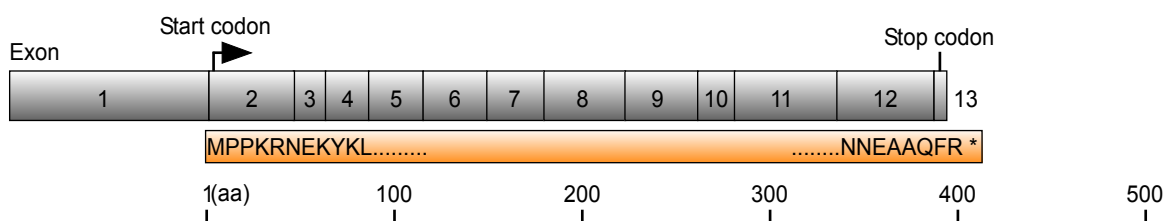

Kinase domain

Transmembrane domain
